# Supplementary material for: Range expansion of the Bluetongue vector, Culicoides imicola, in continental France likely due to rare wind-transport events
Source: PubMed Central journal article supplement (PMC4893744; doi:10.1038/srep27247), 2016-06-06
Supplement: srep27247-s2.pdf [file srep27247-s2.pdf]

## Range expansion of the Bluetongue vector, *Culicoides imicola*, in continental France likely due to rare wind-transport events

Stéphanie Jacquet<sup>1, 16, 17\*</sup>, Karine Huber<sup>2</sup>, Nonito Pagès<sup>3, 4</sup>, Sandra Talavera<sup>4</sup>, Laura E. Burgin<sup>5</sup>, Simon Carpenter<sup>6</sup>, Christopher Sanders<sup>6</sup>, Ahmadou H. Dicko<sup>7, §</sup>, Mouloud Djerbal<sup>8, §</sup>, Maria Goffredo<sup>9, §</sup>, Youssef Lhor<sup>10, §</sup>, Javier Lucientes<sup>11, §</sup>, Miguel A. Miranda-Chueca<sup>12, §</sup>, Isabel Pereira Da Fonseca<sup>13, §</sup>, David W. Ramilo<sup>13, §</sup>, Marie-Laure Setier-Rio<sup>14, §</sup>, Jérémy Bouyer<sup>1, 15</sup>, Christine Chevillon<sup>16, 17</sup>, Thomas Balenghien<sup>1</sup>, Hélène Guis<sup>1</sup>, Claire Garros<sup>1\*</sup>

<sup>1</sup> Cirad, UMR15 CMAEE, 34398 Montpellier, France; INRA, UMR1309 CMAEE, 34398 Montpellier, France. <sup>2</sup> INRA, UMR1309 CMAEE, 34398 Montpellier, France; Cirad, UMR15 CMAEE, 34398 Montpellier, France. <sup>3</sup> Cirad, UMR15 CMAEE, 97170 Petit-Bourg, France; INRA, UMR1309 CMAEE 34398 Montpellier, France. <sup>4</sup> Centre de Recerca en Sanitat Animal (CRESA), UAB-IRTA, Campus de la Universitat Autònoma de Barcelona, Bellaterra (Cerdanyola del Vallès), Spain. <sup>5</sup> Met Office, Exeter, UK. <sup>6</sup> Vector-borne Viral Diseases Programme, The Pirbright Institute, Pirbright, UK. <sup>7</sup> West African Science Service on Climate Change and Adapted Land Use, Climate Change Economics Research Program, Cheikh Anta Diop University, Dakar-Fann, Sénégal. <sup>8</sup> Institut National de la Médecine Vétérinaire (IMV), Laboratoire vétérinaire régional, Tizi Ouzou, Algeria. <sup>9</sup> Istituto Zooprofilattico Sperimentale dell'Abruzzo e del Molise 'G. Caporale', 64100 Teramo, Italy. <sup>10</sup> Office National de Sécurité Sanitaire des produits Alimentaires (ONSSA), Rabat, Morocco. <sup>11</sup> Facultad de Veterinaria, University of Zaragoza (UZ), Zaragoza, Spain. <sup>12</sup> Laboratory of Zoology, University of Balearics (UIB), Palma de Mallorca, Spain. <sup>13</sup> CIISA, Faculdade de Medicina Veterinária, Universidade de Lisboa (FMV-ULisboa), Lisboa, Portugal. <sup>14</sup> Entente interdépartementale pour la démoustication-Méditerranée (EID-Méd), Montpellier, France. <sup>15</sup> Institut Sénégalais de Recherches Agricoles (ISRA), Laboratoire National de l'Élevage et de Recherches Vétérinaires, Dakar, Sénégal. <sup>16</sup> CNRS, Université de Montpellier, UMR 5290 Maladies Infectieuses & Vecteurs-Ecologie, Génétique, Ecologie, Contrôle (MIVEGEC). <sup>17</sup> IRD, UR 224 MIVEGEC, BP 64501, Agropolis, 34 394 Montpellier cedex 5, 25 IRD, (INTERTRYP), UMR177 IRD-CIRAD, TA A-17/G, Campus International de Baillarguet, Montpellier, France.

\*Corresponding authors

\*Cirad, UMR Contrôle des Maladies Animales Exotiques et Emergentes, Campus International de Baillarguet, TA-A15/G, 34398 Montpellier cedex 5, France, stephanie.jacquet@cirad.fr, claire.garros@cirad.fr

§ by alphabetical order.

## Supplementary Information

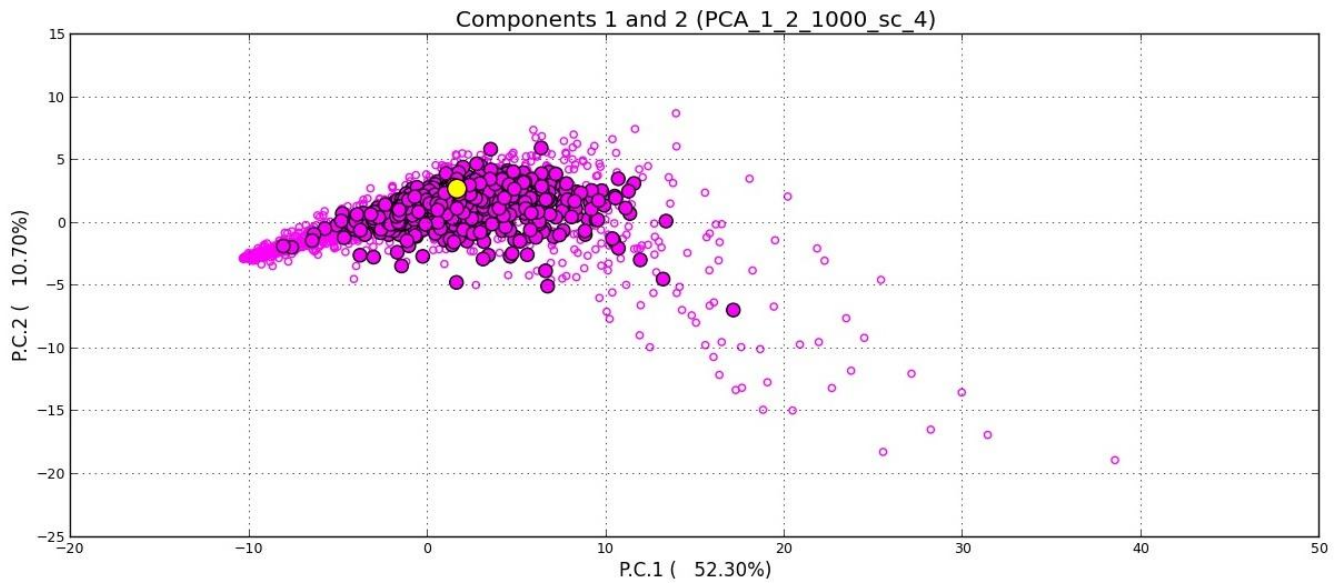

**Supplementary Figure 1 | Principal component analysis (PCA) in the space of summary statistics performed under the most probable scenario (Scenario 4).** The observations are the simulated datasets and the variables are the summary statistics. Small pink circles correspond to simulated statistics with parameters drawn from the prior distributions, the large pink dots correspond to the simulated datasets drawn from the posteriors distributions and the yellow dot represents the real *C. imicola* data set.

**Supplementary Video clip 1 | NAME simulations of individual trajectories.** Full 36-hour back-trajectories for all particles together are presented for each day during the full observation period. Maps were generated using ArcGIS software v10.2.2 (ESRI, Redlands, CA).



|                       |                      |    |       |            |   |    |    |       |            |   |    |    |        |            |    |       |   |     |            |   |     |   |     |            |    |     |
|-----------------------|----------------------|----|-------|------------|---|----|----|-------|------------|---|----|----|--------|------------|----|-------|---|-----|------------|---|-----|---|-----|------------|----|-----|
| 22                    | Vilanova Muga        | 52 | 6,486 | 27/03/2008 | 1 | 13 | 52 | 7,887 | -          | 0 | -  |    |        |            |    |       |   |     |            |   |     |   |     |            |    |     |
| <b>France</b>         |                      |    |       |            |   |    |    |       |            |   |    |    |        |            |    |       |   |     |            |   |     |   |     |            |    |     |
| 9                     | St Jean Pla de Corts | 20 | 144   | 07/10/2008 | 3 | 20 |    |       |            |   |    |    |        |            |    |       |   |     |            |   |     |   |     |            |    |     |
| 2                     | Vebre                |    |       |            |   |    | 25 | 8,972 | -          | 0 | -  | 26 | 23,788 | 0          | 25 | 2,305 | 0 | 27  | 1,155      | 0 |     |   |     |            |    |     |
| 1                     | Clermont             |    |       |            |   |    | 23 | 740   | -          | 0 | -  | 26 | 446    | 0          | 26 | 5,306 | 0 | 27  | 3,069      | 0 |     |   |     |            |    |     |
| 5                     | Argeles Sur Mer      |    |       |            |   |    | 23 | 3,080 | -          | 0 | -  |    |        |            |    |       |   |     |            |   |     |   |     |            |    |     |
| 4                     | Argeles Sur Mer      |    |       |            |   |    |    |       |            |   |    | 25 | 92     | 0          | 24 | 81    | 0 | 21  | 62         | 0 |     |   |     |            |    |     |
| 3                     | Toreilles            | 21 | 229   | -          | 0 | -  |    |       |            |   |    |    |        |            |    |       |   |     |            |   |     |   |     |            |    |     |
| <b>Sentinel sites</b> |                      |    |       |            |   |    |    |       |            |   |    |    |        |            |    |       |   |     |            |   |     |   |     |            |    |     |
| <b>France</b>         |                      |    |       |            |   |    |    |       |            |   |    |    |        |            |    |       |   |     |            |   |     |   |     |            |    |     |
| 6                     | Vives                |    |       |            |   |    | 1  | 7     | 19/10/2009 | 0 | 7  |    |        |            |    |       |   |     |            |   |     |   |     |            |    |     |
| 10                    | Ceret                |    |       |            |   |    | 1  | 16    | 19/10/2009 | 0 | 16 |    |        |            |    |       |   |     |            |   |     |   |     |            |    |     |
| 18                    | Reynes               |    |       |            |   |    | 1  | 1     | 19/10/2009 | 0 | 1  | 1  | 408    | 11/10/2010 | 0  | 408   | 1 | 105 | 18/10/2011 | 0 | 105 | 1 | 466 | 25/09/2012 | 8  | 466 |
| 15                    | Ceret                |    |       |            |   |    |    |       |            |   |    | 1  | 186    | 11/10/2010 | 0  | 186   | 1 | 194 | 18/10/2011 | 0 | 194 | 1 | 2   | 26/09/2012 | 3  | 2   |
| 17                    | Amélie Les Bains     |    |       |            |   |    | 1  | 1     | 19/10/2009 | 0 | 1  |    |        |            |    |       |   |     |            |   |     |   |     |            |    |     |
|                       | Palalda              |    |       |            |   |    |    |       |            |   |    |    |        |            |    |       |   |     |            |   |     |   |     |            |    |     |
| 7                     | Taillet              |    |       |            |   |    | 1  | 1     | 19/10/2009 | 0 | 1  |    |        |            |    |       |   |     |            |   |     |   |     |            |    |     |
| 21                    | Maureillas Las Illas |    |       |            |   |    |    |       |            |   |    | 1  | 0      | 11/10/2010 | 0  | 0     | 1 | 109 | 18/10/2011 | 0 | 109 | 1 | 10  | 25/09/2012 | 11 | 10  |
| 20                    | Maureillas Las Illas |    |       |            |   |    |    |       |            |   |    | 1  | 6      | 11/10/2010 | 0  | 6     | 1 | 0   | 18/10/2011 | 0 | 0   | 1 | 20  | 25/09/2012 | 0  | 20  |
| 14                    | Albere               |    |       |            |   |    |    |       |            |   |    | 1  | 6      | 11/10/2010 | 1  | 6     | 1 | 3   | 18/10/2011 | 0 | 3   | 1 | 1   | 26/09/2012 | 2  | 1   |

|           |                  |  |  |   |   |            |   |   |   |    |            |   |    |   |    |            |   |    |   |     |                   |          |     |
|-----------|------------------|--|--|---|---|------------|---|---|---|----|------------|---|----|---|----|------------|---|----|---|-----|-------------------|----------|-----|
| <b>19</b> | <b>Cerbere</b>   |  |  | 1 | 0 | 21/10/2009 | 0 | 0 | 1 | 5  | 14/10/2010 | 0 | 5  | 1 | 3  | 19/10/2011 | 0 | 3  | 1 | 9   | <b>24/09/2012</b> | <b>3</b> | 9   |
| <b>16</b> | Banyuls          |  |  | 1 | 0 | 19/10/2009 | 0 | 0 | 1 | 2  | 14/10/2010 | 0 | 2  | 1 | 2  | 19/10/2011 | 0 | 2  | 1 | 0   | 24/09/2012        | 0        | 0   |
| <b>13</b> | Montesquieu      |  |  | 1 | 0 | 20/10/2009 | 0 | 0 | 1 | 9  | 13/10/2010 | 0 | 9  | 1 | 0  | 18/10/2011 | 0 | 0  | 1 | 0   | 26/09/2012        | 0        | 0   |
|           | Des Alberes      |  |  |   |   |            |   |   |   |    |            |   |    |   |    |            |   |    |   |     |                   |          |     |
| <b>11</b> | Laroque          |  |  |   |   |            |   |   | 1 | 1  | 13/10/2010 | 0 | 1  | 1 | 37 | 17/10/2011 | 0 | 37 | 1 | 7   | 24/09/2012        | 0        | 7   |
|           | Des Alberes      |  |  |   |   |            |   |   |   |    |            |   |    |   |    |            |   |    |   |     |                   |          |     |
| <b>12</b> | <b>Collioure</b> |  |  |   |   |            |   |   | 1 | 1  | 14/10/2010 | 0 | 1  | 1 | 14 | 19/10/2011 | 0 | 14 | 1 | 103 | <b>25/09/2012</b> | <b>1</b> | 103 |
| <b>8</b>  | Sorede           |  |  |   |   |            |   |   | 1 | 41 | 13/10/2010 | 0 | 41 | 1 | 1  | 19/10/2011 | 0 | 1  | 1 | 53  | 24/09/2012        | 0        | 53  |

For *C. imicola* collections, we reported only the data for the maximum abundance collection date. Nb = number. Locations and collection dates in bold are positive sites for *C. imicola* in the Pyrénées-Orientales department.

**Supplementary Table 2 | COI and Cytb concatenated genetic diversity and haplotype composition within sample site.**

| Site                           | N  | H  | Hd ± SD     | π ± SD          | Haplotype composition |    |    |    |    |    |    |    |    |     |     |     |     |     |     |     |     |     |     |     |     |     |     |     |     |     |     |     |     |     |     |  |
|--------------------------------|----|----|-------------|-----------------|-----------------------|----|----|----|----|----|----|----|----|-----|-----|-----|-----|-----|-----|-----|-----|-----|-----|-----|-----|-----|-----|-----|-----|-----|-----|-----|-----|-----|-----|--|
|                                |    |    |             |                 | H1                    | H2 | H3 | H4 | H5 | H6 | H7 | H8 | H9 | H10 | H11 | H12 | H13 | H14 | H15 | H16 | H17 | H18 | H19 | H20 | H21 | H22 | H23 | H24 | H25 | H26 | H27 | H28 | H29 | H30 | H31 |  |
| Algeria                        | 17 | 7  | 0.86 ± 0.05 | 0.0015 ± 0.0002 | 5                     | 3  | 1  | 3  | 1  | 2  | 2  |    |    |     |     |     |     |     |     |     |     |     |     |     |     |     |     |     |     |     |     |     |     |     |     |  |
| Morocco                        | 14 | 11 | 0.95 ± 0.04 | 0.0020 ± 0.0002 |                       | 1  |    |    |    |    |    | 3  | 1  | 1   |     |     |     | 2   |     |     |     |     |     | 1   | 1   | 1   | 1   | 1   | 1   |     |     |     |     |     |     |  |
| Portugal                       | 15 | 7  | 0.81 ± 0.09 | 0.0013 ± 0.0003 |                       |    |    |    |    | 2  | 7  |    | 1  | 2   |     |     |     |     |     |     |     |     |     |     |     |     |     |     |     |     |     | 1   | 1   | 1   |     |  |
| Continental Spain              | 22 | 11 | 0.83 ± 0.07 | 0.0013 ± 0.0002 |                       | 2  |    |    |    |    | 9  |    | 1  | 1   | 1   | 1   | 1   | 3   | 1   | 1   | 1   |     |     |     |     |     |     |     |     |     |     |     |     |     |     |  |
| Balearic Islands,<br>Spain     | 8  | 3  | 0.67 ± 0.12 | 0.0007 ± 0.0001 | 4                     |    |    |    |    |    | 3  | 1  |    |     |     |     |     |     |     |     |     |     |     |     |     |     |     |     |     |     |     |     |     |     |     |  |
| Pyénées-<br>Orientales, France | 17 | 6  | 0.75 ± 0.09 | 0.0010 ± 0.0002 | 2                     | 3  |    |    |    | 1  | 8  |    |    |     |     |     |     |     |     | 2   |     | 1   |     |     |     |     |     |     |     |     |     |     |     |     |     |  |
| Var, France                    | 16 | 3  | 0.54 ± 0.09 | 0.0056 ± 0.0001 |                       | 10 |    |    |    |    | 5  |    |    |     |     |     |     |     |     |     |     |     |     | 1   |     |     |     |     |     |     |     |     |     |     |     |  |
| Corsica, France                | 16 | 6  | 0.85 ± 0.02 | 0.0013 ± 0.0001 | 1                     | 5  |    | 3  |    |    | 5  |    |    |     |     |     |     |     |     |     | 1   | 1   |     |     |     |     |     |     |     |     |     |     |     |     |     |  |
| Sardinia, Italy                | 8  | 3  | 0.68 ± 0.12 | 0.0007 ± 0.0002 |                       |    |    | 3  |    | 1  | 4  |    |    |     |     |     |     |     |     |     |     |     |     |     |     |     |     |     |     |     |     |     |     |     |     |  |

For each site, the number of samples (N), the number of haplotypes (H), haplotype (Hd) and nucleotide (π) diversity and their standard deviations (SD) are indicated.

1 **Supplementary Table 3 | P-values inferred by the Wilcoxon test of bottleneck,  $F_{IS}$  values within samples and effective population sizes**

| Country                 | Sites                 | code | IAM      | TPM      | SMM    | $F_{IS}$ |
|-------------------------|-----------------------|------|----------|----------|--------|----------|
| Algeria                 | Skikda                | J    | 0.0185*  | 0.5000   | 0.9355 | 0.107    |
|                         | Wilaya de Jijel       | I    | 0.0136*  | 0.3671   | 0.8984 | 0.050    |
| Morocco                 | Khemisset             | H    | 0.4101   | 0.9179   | 0.9951 | 0.030    |
|                         | Sidi Yahia El Gharb   | G    | 0.5898   | 0.9179   | 0.9970 | 0.140    |
| Portugal                | Castelo Branco        | B    | 0.1250   | 0.5898   | 0.9179 | 0.096    |
|                         | Beja                  | A    | 0.0644   | 0.5898   | 0.8984 | 0.122    |
| Balearic Islands, Spain | Majorca               | F    | 0.1015   | 0.5898   | 0.9814 | 0.097    |
| Continental Spain       | Girona                | E    | 0.0644   | 0.5898   | 0.1503 | 0.080    |
|                         | Toledo                | D    | 0.0097** | 0.4101   | 0.8984 | 0.010    |
|                         | Huelva                | C    | 0.0019** | 0.0644   | 0.5449 | 0.025    |
| Continental France      | Pyrénées-Orientales   | M    | 0.0068** | 0.1503   | 0.3671 | -0.015   |
|                         | Roquebrune-sur-Argens | K    | 0.0019** | 0.0097** | 0.3261 | -0.038   |
|                         | Bormes-les-Mimosas    | L    | 0.0097** | 0.1503   | 0.4550 | 0.024    |
| Corsica, France         | Figari                | N    | 0.0097** | 0.2480   | 0.8496 | 0.036    |
|                         | Pietracorbara         | O    | 0.0019** | 0.0644   | 0.8750 | 0.112    |
| Sardinia, Italy         | San Giovanni Suergiu  | P    | 0.0185*  | 0.2481   | 0.7871 | 0.052    |

2 For the bottleneck analysis, p-values correspond to the Wilcoxon unilateral test under each mutation model (Infinite Allele Mutation: IAM, Two-phase model: TPM and  
3 Stepwise Mutation Model: SMM). Statistical significance is tested over 10000 replicates (\*\*P < 0.01, \*P < 0.05). P-values obtained for the Hardy-Weinberg test were adjusted  
4 for multiple comparisons at the nominal level (5%) of 0.00037.



**Supplementary Table 4 | Mitochondrial pairwise  $F_{ST}$  values between *C. imicola* populations.**

|                                    | Algeria        | Sardinia, Italy | Corsica, France | Pyrénées-<br>Orientales,<br>France | Var, France    | Morocco | Portugal       | Balearics Island,<br>Spain |
|------------------------------------|----------------|-----------------|-----------------|------------------------------------|----------------|---------|----------------|----------------------------|
| Sardinia, Italy                    | 0.03188        |                 |                 |                                    |                |         |                |                            |
| Corsica, France                    | 0.04440        | 0.00444         |                 |                                    |                |         |                |                            |
| Pyrénées-<br>Orientales,<br>France | 0.04421        | <b>0.19543</b>  | 0.04354         |                                    |                |         |                |                            |
| Var, France                        | <b>0.15972</b> | <b>0.34694</b>  | 0.10000         | 0.03702                            |                |         |                |                            |
| Morocco                            | <b>0.07275</b> | <b>0.11014</b>  | 0.04071         | 0.00905                            | 0.03303        |         |                |                            |
| Portugal                           | 0.06163        | <b>0.07438</b>  | <b>0.07590</b>  | 0.02891                            | <b>0.07054</b> | 0.02240 |                |                            |
| Balearics Island,<br>Spain         | 0.02336        | <b>0.28571</b>  | <b>0.24953</b>  | <b>0.19914</b>                     | <b>0.47986</b> | 0.12475 | <b>0.19556</b> |                            |
| Continental<br>Spain               | <b>0.12118</b> | <b>0.12695</b>  | <b>0.07619</b>  | <b>0.05231</b>                     | 0.05430        | 0.01229 | 0.03447        | <b>0.20952</b>             |

Significant values are highlighted in bold.

**Supplementary Table 5 | Approximate Bayesian computation (ABC) results.**

| Description of tested scenarios                                                                                                                             | Posterior probability | 95% credibility interval | Type I error | Type II error |
|-------------------------------------------------------------------------------------------------------------------------------------------------------------|-----------------------|--------------------------|--------------|---------------|
| Independent introductions from North Africa into Spain, Sardinia, Corsica and Pyrénées-Orientales                                                           | 0.07                  | [0.01-0.13]              | 0.16         | 0.06          |
| Introduction from North Africa into Spain, then colonization of Pyrénées-Orientales out from Spain                                                          | 0.01                  | [0.00-0.06]              | 0.18         | 0.06          |
| Introduction from North Africa into Sardinia, then colonization of Pyrénées-Orientales out from Sardinia                                                    | 0.29                  | [0.26-0.32]              | 0.21         | 0.09          |
| Introduction from North Africa into Sardinia, then introduction in Corsica out from Sardinia, and then colonization of Pyrénées-Orientales out from Corsica | <b>0.62</b>           | <b>[0.60-0.64]</b>       | <b>0.28</b>  | <b>0.06</b>   |

Type 1 error is the probability of selecting another scenario when the chosen scenario is true. Type 2 error is the mean probability of selecting the chosen scenario when it is false. The selected (most probable) scenario is highlighted in bold (see also Fig. S7).

**Supplementary Table 6 | ABC model checking of the most probable scenario (Scenario 4).**

| <b>summary statistics</b> | <b>observed value</b> | <b>proportion (simulated&lt;observed)</b> | <b>summary statistics</b> | <b>observed value</b> | <b>proportion (simulated&lt;observed)</b> | <b>summary statistics</b> | <b>observed value</b> | <b>proportion (simulated&lt;observed)</b> |
|---------------------------|-----------------------|-------------------------------------------|---------------------------|-----------------------|-------------------------------------------|---------------------------|-----------------------|-------------------------------------------|
| NAL_1_1                   | 5.0000                | 0.6330                                    | V2P_1_1&4                 | 1.3863                | 0.3315                                    | DAS_1_2&3                 | 0.3945                | 0.3635                                    |
| NAL_1_2                   | 4.3333                | 0.5850                                    | V2P_1_1&5                 | 1.3480                | 0.3255                                    | DAS_1_2&4                 | 0.3845                | 0.3985                                    |
| NAL_1_3                   | 4.6667                | 0.5440                                    | V2P_1_2&3                 | 1.3258                | 0.3310                                    | DAS_1_2&5                 | 0.4048                | 0.3855                                    |
| NAL_1_4                   | 5.0000                | 0.5915                                    | V2P_1_2&4                 | 1.3718                | 0.3355                                    | DAS_1_3&4                 | 0.3984                | 0.4425                                    |
| NAL_1_5                   | 4.4444                | 0.5445                                    | V2P_1_2&5                 | 1.3245                | 0.3420                                    | DAS_1_3&5                 | 0.4049                | 0.4220                                    |
| HET_1_1                   | 0.6101                | 0.6745                                    | V2P_1_3&4                 | 1.3911                | 0.3290                                    | DAS_1_4&5                 | 0.3989                | 0.4565                                    |
| HET_1_2                   | 0.6113                | 0.7160                                    | V2P_1_3&5                 | 1.3621                | 0.3420                                    | DM2_1_1&2                 | 0.0504                | 0.0805                                    |
| HET_1_3                   | 0.5909                | 0.6200                                    | V2P_1_4&5                 | 1.4067                | 0.3375                                    | DM2_1_1&3                 | 0.0468                | 0.1135                                    |
| HET_1_4                   | 0.6074                | 0.6310                                    | FST_1_1&2                 | 0.0332                | 0.2965                                    | DM2_1_1&4                 | 0.0354                | 0.0825                                    |
| HET_1_5                   | 0.5939                | 0.6340                                    | FST_1_1&3                 | 0.0352                | 0.4550                                    | DM2_1_1&5                 | 0.0605                | 0.1440                                    |
| VAR_1_1                   | 1.3344                | 0.3385                                    | FST_1_1&4                 | 0.0261                | 0.4365                                    | DM2_1_2&3                 | 0.0616                | 0.2345                                    |
| VAR_1_2                   | 1.2770                | 0.3340                                    | FST_1_1&5                 | 0.0320                | 0.3400                                    | DM2_1_2&4                 | 0.0450                | 0.0860                                    |
| VAR_1_3                   | 1.3534                | 0.3460                                    | FST_1_2&3                 | 0.0146                | 0.3340                                    | DM2_1_2&5                 | 0.0639                | 0.3585                                    |
| VAR_1_4                   | 1.4478                | 0.3500                                    | FST_1_2&4                 | 0.0159                | 0.1545                                    | DM2_1_3&4                 | 0.0173                | 0.0165 (*)                                |
| VAR_1_5                   | 1.3576                | 0.3595                                    | FST_1_2&5                 | -0.0004               | 0.2160                                    | DM2_1_3&5                 | 0.0776                | 0.3590                                    |
| MGW_1_1                   | 0.9854                | 0.8330                                    | FST_1_3&4                 | 0.0042                | 0.0420 (*)                                | DM2_1_4&5                 | 0.0579                | 0.1545                                    |
| MGW_1_2                   | 0.9000                | 0.6515                                    | FST_1_3&5                 | 0.0119                | 0.3580                                    |                           |                       |                                           |
| MGW_1_3                   | 1.0286                | 0.9160                                    | FST_1_4&5                 | 0.0049                | 0.0590                                    |                           |                       |                                           |
| MGW_1_4                   | 0.9712                | 0.7930                                    | LIK_1_1&2                 | 1.0667                | 0.5670                                    |                           |                       |                                           |
| MGW_1_5                   | 0.9677                | 0.8430                                    | LIK_1_1&3                 | 1.0523                | 0.6180                                    |                           |                       |                                           |
| N2P_1_1&2                 | 5.7778                | 0.6655                                    | LIK_1_1&4                 | 0.9948                | 0.6055                                    |                           |                       |                                           |
| N2P_1_1&3                 | 5.7778                | 0.6080                                    | LIK_1_1&5                 | 1.0554                | 0.5920                                    |                           |                       |                                           |
| N2P_1_1&4                 | 5.7778                | 0.5920                                    | LIK_1_2&1                 | 0.9423                | 0.4770                                    |                           |                       |                                           |
| N2P_1_1&5                 | 5.6667                | 0.6085                                    | LIK_1_2&3                 | 0.8331                | 0.4720                                    |                           |                       |                                           |
| N2P_1_2&3                 | 5.0000                | 0.5110                                    | LIK_1_2&4                 | 0.8503                | 0.3980                                    |                           |                       |                                           |
| N2P_1_2&4                 | 5.3333                | 0.5390                                    | LIK_1_2&5                 | 0.8065                | 0.5155                                    |                           |                       |                                           |
| N2P_1_2&5                 | 4.7778                | 0.5125                                    | LIK_1_3&1                 | 1.0029                | 0.5390                                    |                           |                       |                                           |
| N2P_1_3&4                 | 5.5556                | 0.5470                                    | LIK_1_3&2                 | 0.9266                | 0.5165                                    |                           |                       |                                           |

|           |        |        |           |        |        |
|-----------|--------|--------|-----------|--------|--------|
| N2P_1_3&5 | 5.0000 | 0.4750 | LIK_1_3&4 | 0.9104 | 0.4740 |
| N2P_1_4&5 | 5.4444 | 0.5520 | LIK_1_3&5 | 0.9307 | 0.5560 |
| H2P_1_1&2 | 0.6210 | 0.6675 | LIK_1_4&1 | 0.9566 | 0.5355 |
| H2P_1_1&3 | 0.6120 | 0.6430 | LIK_1_4&2 | 0.9286 | 0.4315 |
| H2P_1_1&4 | 0.6183 | 0.6590 | LIK_1_4&3 | 0.8742 | 0.4170 |
| H2P_1_1&5 | 0.6134 | 0.6520 | LIK_1_4&5 | 0.9132 | 0.4460 |
| H2P_1_2&3 | 0.6038 | 0.6490 | LIK_1_5&1 | 0.8989 | 0.4915 |
| H2P_1_2&4 | 0.6145 | 0.6485 | LIK_1_5&2 | 0.7852 | 0.5140 |
| H2P_1_2&5 | 0.6022 | 0.6685 | LIK_1_5&3 | 0.8042 | 0.4940 |
| H2P_1_3&4 | 0.6010 | 0.5915 | LIK_1_5&4 | 0.8158 | 0.4165 |
| H2P_1_3&5 | 0.5966 | 0.6160 | DAS_1_1&2 | 0.3730 | 0.3740 |
| H2P_1_4&5 | 0.6033 | 0.5920 | DAS_1_1&3 | 0.3790 | 0.3770 |
| V2P_1_1&2 | 1.3115 | 0.3100 | DAS_1_1&4 | 0.3770 | 0.3605 |
| V2P_1_1&3 | 1.3455 | 0.3230 | DAS_1_1&5 | 0.3826 | 0.4000 |

All the summary statistics (used and unused for model selection) were used. For each statistic, the observed value and probability (simulated < observed) are given. For a detail description of the summary statistics, see the DIYABC v.2.0.4 manual. Significant probabilities are represented with an asterisk.

**Supplementary Table 7 | Primers characteristics.**

| <b>Loci</b> | <b>Motif</b>       | <b>Forward</b>            | <b>Reverse</b>                     | <b>Allele size range</b> | <b>T (°C)</b> |
|-------------|--------------------|---------------------------|------------------------------------|--------------------------|---------------|
| 68          | (GT) <sub>n</sub>  | CTTTTCCGTTTCTTTTTATTTCTTT | GTTTCTTTCTGGTCGCGTTGGTTGCTG        | 99-105                   | 60            |
| 12b         | (CT) <sub>n</sub>  | TTATGTGTGTATGTTAGCAAGGTCA | GTTTCTTCTTCGGATCAAAGAAATTTTGCC     | 129-139                  | 50            |
| 3b          | (AC) <sub>n</sub>  | ATGCGGATGTTTGAAGTG        | GTTTCTTTTTTGTGTCTTATTGCC           | 154-175                  | 50            |
| 31          | (CAA) <sub>n</sub> | TTCTGTTCGGCTGTTGCGTT      | GTTTCTTCTTTTTACGTGGTGGTCATT        | 152-168                  | 60            |
| 41b         | (CT) <sub>n</sub>  | GAGGAGGAGGTAGAA           | GTTTCTTCTATTAGTCAATGGTG            | 155-166                  | 50            |
| 35t         | (AC) <sub>n</sub>  | TTTGTA AAAAGCCAGTTCAACCG  | GTTTCTTATCGAACGAAGGAAATAACCAC      | 171-194                  | 60            |
| 88b         | (AC) <sub>n</sub>  | TTTGTTTCGATTTGTAGTG       | GTTTCTTCCTCTCTTTTCATTTCGC          | 243-256                  | 50            |
| 16          | (TG) <sub>n</sub>  | TTGCCTTTGCTTGTTGAGGATG    | GTTTCTTTCCTCTTTAAAATCACTGACGTG     | 292-299                  | 60            |
| 88          | (CAT) <sub>n</sub> | GTTGGTGCTTTGTTGTGTTGT     | GTTTCTTTTTCTTTTTCTCCTTTTTGTTTCTTTC | 344-348                  | 50            |

**Supplementary Table 8 | Prior distributions of demographic, historical and mutation parameters used for ABC inferences.**

| <b>Parameter description</b>                               | <b>Parameter</b>               | <b>Prior distribution</b> |
|------------------------------------------------------------|--------------------------------|---------------------------|
| Stable effective population size                           | N                              | Loguniform [1000; 200000] |
| Time of colonization events in Pyrénées-Orientales         | $t_p$                          | Uniform [40; 10000]       |
| Time of colonization events in Sardinia, Corsica and Spain | $t_s, t_c, t_e$                | Uniform [140; 10000]      |
| Duration of bottleneck                                     | $D_B$                          | Uniform [0; 50]           |
| Founding effective population sizes                        | $N_s$                          | Loguniform [2; 100]       |
| Mean mutation rate                                         | $\mu_{\text{microsatellites}}$ | Loguniform [1E-6; 1E-4]   |
| Mean parameter of the geometric distribution of length     | P                              | Uniform [1E-1; 3E-1]      |
| Mean mutation rate for nucleotide instability              | SNI                            | Uniform [1E-8; 1E-4]      |

Effective population sizes (N) are expressed in number of diploid individuals and times of events (t) in number of generations going back to the past. Conditions among the parameters used during the simulations were  $t_s \geq t_p$ ,  $t_e \geq t_p$ ,  $t_c \geq t_p$ .
